# Supplementary material
Source: HighWire-hosted journal article supplement (https://jmg.bmj.com/highwire/filestream/160496/field_highwire_adjunct_files/0/Sup_Fig.1.pdf)

**Supplementary Figure 1.** Transverse lung sections from adult A) wt and B) *Fgf10* +/- mice. Giemsa Stain (10X).

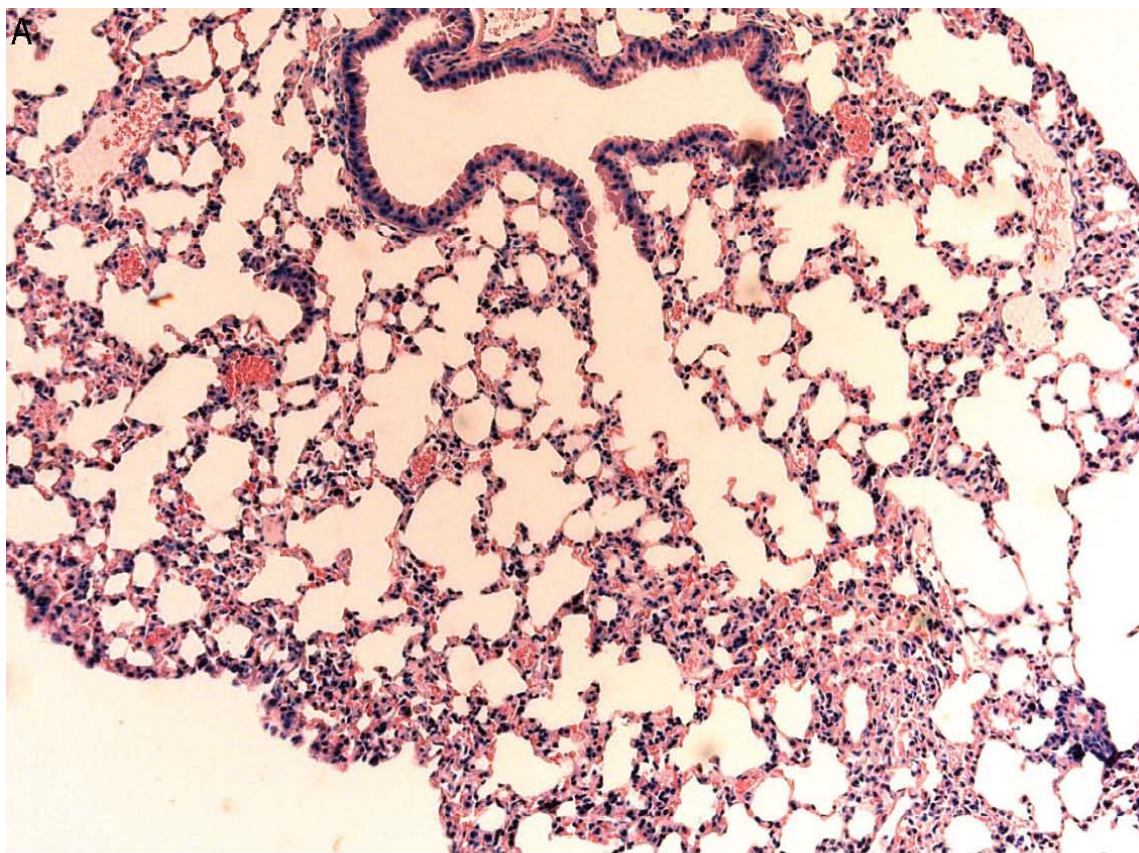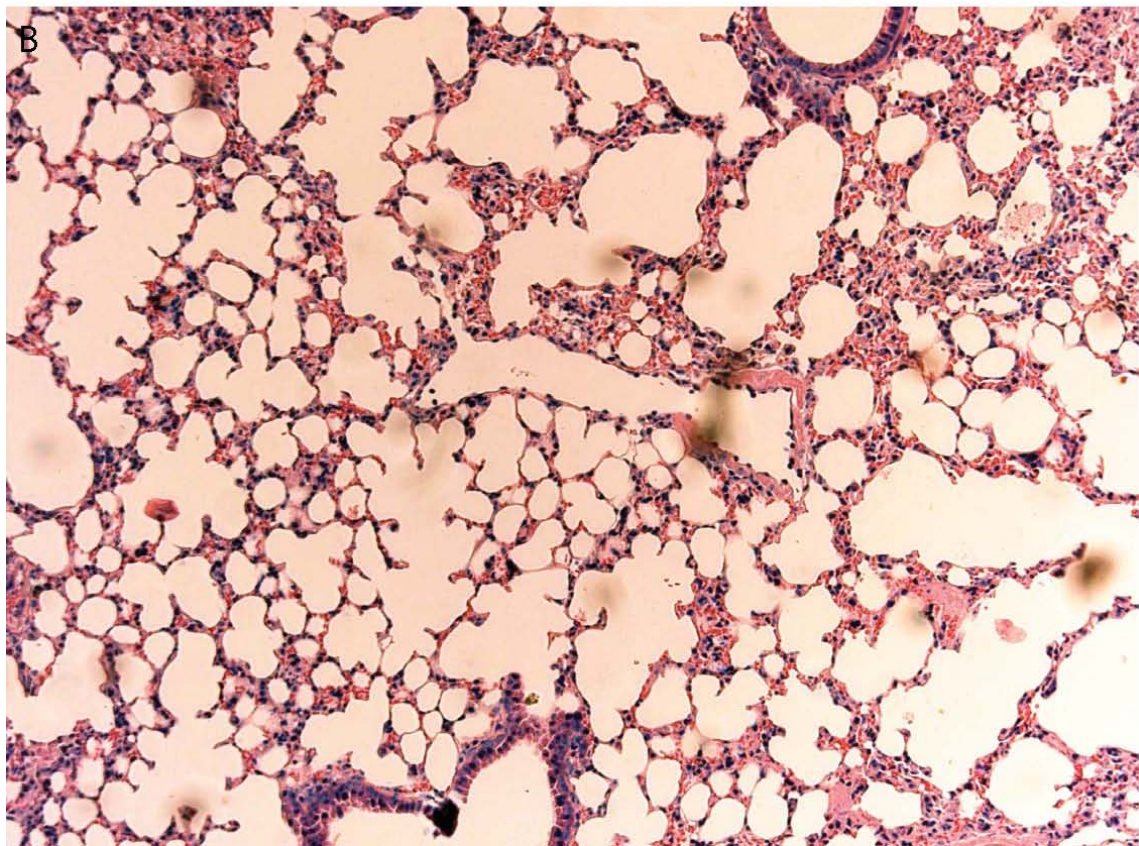

Supplement: Sup_Fig.1.pdf [file Sup_Fig.1.pdf]
